# Supplementary material for: Estimation of required sample size for external validation of risk models for binary outcomes
Source: PubMed Central journal article supplement (PMC8529102; doi:10.1177/09622802211007522), 2021-04-21

## Supplementary material 2 – Additional Simulation Results

### 1. Simulation of data for DGMs 1-4 (Section 5 of the main paper)

**DGM 1:** The linear predictor is conditionally Normally distributed given  $Y$  with the corresponding variances being equal. Data are generated from a LDA model under Assumption 2. In this simulation  $Y$  is fixed, i.e. we fix the number of cases,  $n_1$ , and the number of controls,  $n_0$ , rather than drawing  $Y$  randomly. To achieve this, we first note that  $C = \Phi\left(\frac{\mu_1 - \mu_0}{\sigma\sqrt{2}}\right)$ . Using the relationship between the parameters in a logistic regression model and the corresponding LDA model<sup>22</sup>, the parameters in equation (10) of the main paper can be expressed as

$$\alpha = -\log\left(\frac{n_1}{n_0}\right) + \frac{\mu_1^2 - \mu_0^2}{2\sigma^2} \quad \text{and} \quad \beta_{CS} = \frac{\mu_1 - \mu_0}{\sigma^2}.$$

So,  $C = \Phi\left(\frac{\sigma\beta_{CS}}{\sqrt{2}}\right)$  and solving for  $\sigma$ ,

$$\sigma = \frac{\sqrt{2}\Phi^{-1}(C)}{\beta_{CS}}. \quad (*)$$

Assuming that  $\alpha = 0$  and  $\beta_{CS} = 1$  for a well calibrated model:

$$\mu_1 = \frac{\sigma^2}{2} + \log\frac{n_1}{n_0}$$

$$\mu_0 = \mu_1 - \sigma^2$$

Values of  $\sigma^2$ ,  $\mu_0$  and  $\mu_1$  are chosen to achieve the required  $p$  and  $C$ . We note that when the distribution of the linear predictor is conditionally Normal given the outcome and the corresponding variances equal, the marginal distribution of the linear predictor is also approximately Normal when  $\mu_1 - \mu_2$  is small relative to  $\sigma$ , corresponding to values of  $C$  up to 0.9 (see Figure S2).

**DGM 2:** The linear predictor is conditionally Normally distributed given the outcome

$$\eta|Y \sim N(\mu_Y, \sigma_Y^2) \text{ and } Y = 0, 1$$

and  $\sigma_0 \neq \sigma_1$ . To generate a linear predictor with unequal variances for cases and controls we use

$\sigma_0 = 1.33 \times \sigma^*$  and  $\sigma_1 = 0.67 \times \sigma^*$ , where  $\sigma^* = \sqrt{2}\Phi^{-1}(C)$  as in equation (\*) with  $\beta_{CS} = 1$ . We then use

$\mu_1 = \frac{\sigma^2}{2} + \log\left(\frac{n_1}{n_0}\right)$  and  $\mu_0 = \mu_1 - \sigma^2 + k$ . Contrary to DGM 1,  $Y$  is not fixed; the binary outcomes are

generated from the following logistic regression:  $\text{logit}(P(Y = 1)) = \eta$ . Values of  $\sigma_1, \sigma_2, \mu_0, \mu_1$  and  $k$  are chosen to achieve the required  $p$  and  $C$ .

**DGM 3:** The marginal distribution of the linear predictor is Normal:  $\eta \sim N(\mu, \sigma^2)$ . The binary outcomes are generated from the following logistic regression model:  $\text{logit}(P(Y = 1)) = \eta$ . Values for  $\mu$  and  $\sigma^2$  were chosen to generate data with the required  $p$  and  $C$ . More precisely, for values of anticipated  $C$  up to 0.8,  $\mu$  and  $\sigma^2$  were calculated directly using (7) and (8) in Section 3.1. For higher values of  $C$ , the values of  $\mu$  and  $\sigma^2$  provided by (7) and (8) were adjusted to give values of  $C$  and  $p$  closer to the required anticipated ones. It is noted that the resulting conditional distribution of the linear predictor given the outcome is also approximately Normal, and the corresponding variances are very similar, for values of  $C$  up to 0.8 (see Figure S3).

**DGM 4:** The linear predictor with a skewed marginal distribution is generated as the linear combination of 4 independent binary variables with prevalences 0.1, 0.2, 0.3 and 0.5, respectively:

$\eta = \beta_0 + \beta_1 X_1 + \beta_2 X_2 + \beta_3 X_3 + \beta_4 X_4$ . The binary outcomes are then generated from the model  $\text{logit}(P(Y = 1 | X_1, X_2, X_3, X_4)) = \eta$ . Values for the regression coefficients  $\beta_0, \beta_1, \beta_2, \beta_3, \beta_4$  were varied to achieve the required  $p$  and  $C$ . The conditional distribution of the linear predictor given the outcome is also highly skewed and the variances for cases and controls are different (see Figure S4).

## 2. Simulation setting for Survival data (Section 6 of the main paper)

The survival function of the proportion hazards is given by

$$S(t|x) = \exp[-H_0(t) \times \exp(\beta'x)]$$

The linear predictor was generated from a Normal distribution, varying the parameters to achieve the desired values of C-index and prevalence.

Let baseline hazard  $h_0(t) = \lambda t^{\rho-1}$  from *Weibull*( $\lambda, \rho$ ) with shape  $\rho = 0.0009$  and scale  $\lambda=1$ . Then we have  $H_0(t) = \lambda t^\rho$  which is invertible, so that  $H_0^{-1}(t) = (\frac{t}{\lambda})^{\frac{1}{\rho}}$ . The survival time T can be generated by,

$$t = \left( -\frac{\log(v)}{\lambda \exp(\beta'x)} \right)^{\frac{1}{\rho}}$$

Where  $v$  is a random variable with  $V \sim \text{Uni}[0,1]$ . Censoring time C was generated from an exponential distribution.

### 3. Tables and Figures

Table S1. DGM1. % Bias of  $SE_{app}(\hat{C})$  and  $SE_{app}(\hat{\beta}_{CS})$  calculated over 10,000 simulations for true prevalence values 5%, 10% and 30% and true C-statistic of 0.64, 0.72, 0.8, 0.85 and 0.9.

| $p$  | $C$  | $n_{events}$ | C-statistic |            | Calibration slope        |             |            |                          |
|------|------|--------------|-------------|------------|--------------------------|-------------|------------|--------------------------|
|      |      |              | $SE_{true}$ | $SE_{app}$ | % Bias<br>( $SE_{app}$ ) | $SE_{true}$ | $SE_{app}$ | % Bias<br>( $SE_{app}$ ) |
| 0.05 | 0.64 | 50           | 0.0401      | 0.0398     | -1                       | 0.2927      | 0.2897     | -1                       |
|      |      | 100          | 0.0284      | 0.0281     | -1                       | 0.2075      | 0.2048     | -1                       |
|      |      | 200          | 0.0201      | 0.0199     | -1                       | 0.1474      | 0.1448     | -2                       |
|      |      | 400          | 0.0141      | 0.0141     | -1                       | 0.1031      | 0.1024     | -1                       |
| 0.05 | 0.72 | 50           | 0.0366      | 0.0365     | 0                        | 0.1863      | 0.1816     | -2                       |
|      |      | 100          | 0.0260      | 0.0258     | -1                       | 0.1319      | 0.1284     | -3                       |
|      |      | 200          | 0.0185      | 0.0183     | -1                       | 0.0937      | 0.0908     | -3                       |
|      |      | 400          | 0.0130      | 0.0129     | -1                       | 0.0655      | 0.0642     | -2                       |
| 0.05 | 0.8  | 50           | 0.0316      | 0.0315     | 0                        | 0.1385      | 0.1299     | -6                       |
|      |      | 100          | 0.0224      | 0.0223     | -1                       | 0.098       | 0.0918     | -6                       |
|      |      | 200          | 0.0159      | 0.0158     | -1                       | 0.0696      | 0.0649     | -7                       |
|      |      | 400          | 0.0112      | 0.0111     | -1                       | 0.0485      | 0.0459     | -5                       |
| 0.05 | 0.85 | 50           | 0.0273      | 0.0272     | 0                        | 0.1218      | 0.1086     | -11                      |
|      |      | 100          | 0.0194      | 0.0192     | -1                       | 0.0861      | 0.0768     | -11                      |
|      |      | 200          | 0.0138      | 0.0136     | -1                       | 0.0611      | 0.0543     | -11                      |
|      |      | 400          | 0.0097      | 0.0096     | -1                       | 0.0425      | 0.0384     | -10                      |
| 0.05 | 0.9  | 50           | 0.0218      | 0.0217     | 0                        | 0.1126      | 0.0917     | -19                      |
|      |      | 100          | 0.0155      | 0.0154     | -1                       | 0.0793      | 0.0649     | -18                      |
|      |      | 200          | 0.011       | 0.0109     | -1                       | 0.0560      | 0.0459     | -18                      |
|      |      | 400          | 0.0077      | 0.0077     | 0                        | 0.0388      | 0.0324     | -16                      |
| 0.1  | 0.64 | 50           | 0.0416      | 0.0409     | -2                       | 0.3091      | 0.3008     | -3                       |
|      |      | 100          | 0.0290      | 0.0289     | 0                        | 0.2150      | 0.2127     | -1                       |
|      |      | 200          | 0.0206      | 0.0204     | -1                       | 0.1526      | 0.1504     | -1                       |
|      |      | 400          | 0.0145      | 0.0144     | 0                        | 0.1080      | 0.1063     | -2                       |
| 0.1  | 0.72 | 50           | 0.0377      | 0.0375     | 0                        | 0.2007      | 0.1916     | -5                       |
|      |      | 100          | 0.0266      | 0.0265     | 0                        | 0.1391      | 0.1355     | -3                       |
|      |      | 200          | 0.0189      | 0.0188     | -1                       | 0.0984      | 0.0958     | -3                       |
|      |      | 400          | 0.0133      | 0.0133     | 0                        | 0.0698      | 0.0677     | -3                       |
| 0.1  | 0.8  | 50           | 0.0325      | 0.0324     | -1                       | 0.1533      | 0.1404     | -8                       |
|      |      | 100          | 0.0230      | 0.0229     | 0                        | 0.1059      | 0.0992     | -6                       |
|      |      | 200          | 0.0162      | 0.0162     | 0                        | 0.0747      | 0.0702     | -6                       |

|     |      |     |        |        |    |        |        |     |
|-----|------|-----|--------|--------|----|--------|--------|-----|
|     |      | 400 | 0.0115 | 0.0114 | 0  | 0.0530 | 0.0496 | -6  |
| 0.1 | 0.85 | 50  | 0.0281 | 0.028  | -1 | 0.1374 | 0.1198 | -13 |
|     |      | 100 | 0.0199 | 0.0198 | -1 | 0.0947 | 0.0847 | -11 |
|     |      | 200 | 0.014  | 0.014  | 0  | 0.0667 | 0.0599 | -10 |
|     |      | 400 | 0.0099 | 0.0099 | -1 | 0.0472 | 0.0423 | -10 |
| 0.1 | 0.9  | 50  | 0.0225 | 0.0223 | -1 | 0.1294 | 0.1038 | -20 |
|     |      | 100 | 0.0159 | 0.0158 | -1 | 0.0889 | 0.0734 | -17 |
|     |      | 200 | 0.0112 | 0.0112 | -0 | 0.0623 | 0.0519 | -17 |
|     |      | 400 | 0.0079 | 0.0079 | -1 | 0.0440 | 0.0367 | -17 |
| 0.3 | 0.64 | 50  | 0.0481 | 0.0463 | -4 | 0.3685 | 0.3512 | -5  |
|     |      | 100 | 0.0327 | 0.0328 | 0  | 0.2522 | 0.2482 | -2  |
|     |      | 200 | 0.0234 | 0.0232 | -1 | 0.1790 | 0.1755 | -2  |
|     |      | 400 | 0.0162 | 0.0164 | 1  | 0.1236 | 0.1241 | 0   |
| 0.3 | 0.72 | 50  | 0.0431 | 0.0426 | -1 | 0.2478 | 0.2328 | -6  |
|     |      | 100 | 0.0300 | 0.0301 | 0  | 0.1690 | 0.1645 | -3  |
|     |      | 200 | 0.0215 | 0.0213 | -1 | 0.1195 | 0.1163 | -3  |
|     |      | 400 | 0.0149 | 0.0150 | 1  | 0.0826 | 0.0822 | 0   |
| 0.3 | 0.8  | 50  | 0.0372 | 0.0367 | -1 | 0.1978 | 0.1798 | -9  |
|     |      | 100 | 0.0259 | 0.0260 | 0  | 0.1340 | 0.127  | -5  |
|     |      | 200 | 0.0185 | 0.0184 | -1 | 0.0942 | 0.0897 | -5  |
|     |      | 400 | 0.0129 | 0.0130 | 1  | 0.0652 | 0.0634 | -3  |
| 0.3 | 0.85 | 50  | 0.0321 | 0.0317 | -1 | 0.1829 | 0.1595 | -13 |
|     |      | 100 | 0.0224 | 0.0224 | 0  | 0.1229 | 0.1126 | -8  |
|     |      | 200 | 0.016  | 0.0159 | -1 | 0.0859 | 0.0796 | -7  |
|     |      | 400 | 0.0112 | 0.0112 | 0  | 0.0596 | 0.0563 | -6  |
| 0.3 | 0.9  | 50  | 0.0257 | 0.0253 | -1 | 0.1785 | 0.1444 | -19 |
|     |      | 100 | 0.0179 | 0.0179 | 0  | 0.1181 | 0.1019 | -14 |
|     |      | 200 | 0.0127 | 0.0126 | -1 | 0.0820 | 0.072  | -12 |
|     |      | 400 | 0.0089 | 0.0089 | 0  | 0.0570 | 0.0509 | -11 |

Table S2. DGM1. Number of events required to attain a specified standard error for  $\hat{C}$  and  $\hat{\beta}_{CS}$ . % Bias of the estimated sample size (number of events) is calculated over 10,000 simulations for true prevalence values of 5%, 10% and 30% and true C-statistic of 0.64, 0.72, 0.8, 0.85 and 0.9.

| $p$  | $C$  | C-Statistic |                       |                     |        | Calibration Slope |                       |                     |        |
|------|------|-------------|-----------------------|---------------------|--------|-------------------|-----------------------|---------------------|--------|
|      |      | $SE_{req}$  | $\hat{n}_{req}^{(e)}$ | $n_{req,app}^{(e)}$ | % Bias | $SE_{req}$        | $\hat{n}_{req}^{(e)}$ | $n_{req,app}^{(e)}$ | % Bias |
| 0.05 | 0.64 | 0.0125      | 513                   | 507                 | -1     | 0.10              | 420                   | 420                 | 0      |
| 0.05 | 0.72 | 0.0125      | 432                   | 427                 | -1     | 0.10              | 169                   | 165                 | -2     |
| 0.05 | 0.80 | 0.0125      | 322                   | 318                 | -1     | 0.10              | 94                    | 85                  | -10    |
| 0.05 | 0.85 | 0.0125      | 231                   | 238                 | 3      | 0.10              | 73                    | 59                  | -19    |
| 0.05 | 0.90 | 0.0125      | 153                   | 151                 | -1     | 0.10              | 63                    | 43                  | -32    |
| 0.10 | 0.64 | 0.0125      | 541                   | 535                 | -1     | 0.10              | 453                   | 453                 | 0      |
| 0.10 | 0.72 | 0.0125      | 456                   | 451                 | -1     | 0.10              | 188                   | 184                 | -2     |
| 0.10 | 0.80 | 0.0125      | 340                   | 336                 | -1     | 0.10              | 117                   | 99                  | -15    |
| 0.10 | 0.85 | 0.0125      | 249                   | 251                 | 1      | 0.10              | 89                    | 72                  | -19    |
| 0.10 | 0.90 | 0.0125      | 156                   | 160                 | 3      | 0.10              | 79                    | 54                  | -32    |
| 0.30 | 0.64 | 0.0125      | 695                   | 687                 | -1     | 0.10              | 616                   | 616                 | 0      |
| 0.30 | 0.72 | 0.0125      | 563                   | 580                 | 3      | 0.10              | 277                   | 271                 | -2     |
| 0.30 | 0.80 | 0.0125      | 437                   | 432                 | -1     | 0.10              | 178                   | 161                 | -10    |
| 0.30 | 0.85 | 0.0125      | 326                   | 322                 | -1     | 0.10              | 148                   | 127                 | -14    |
| 0.30 | 0.90 | 0.0125      | 208                   | 205                 | -1     | 0.10              | 138                   | 104                 | -25    |
| 0.05 | 0.64 | 0.025       | 129                   | 127                 | -2     | 0.15              | 187                   | 187                 | 0      |
| 0.05 | 0.72 | 0.025       | 107                   | 107                 | 0      | 0.15              | 76                    | 74                  | -3     |
| 0.05 | 0.80 | 0.025       | 78                    | 80                  | 3      | 0.15              | 42                    | 38                  | -10    |
| 0.05 | 0.85 | 0.025       | 59                    | 60                  | 2      | 0.15              | 34                    | 27                  | -21    |
| 0.05 | 0.90 | 0.025       | 38                    | 38                  | 0      | 0.15              | 30                    | 19                  | -37    |
| 0.10 | 0.64 | 0.025       | 136                   | 134                 | -1     | 0.15              | 202                   | 202                 | 0      |
| 0.10 | 0.72 | 0.025       | 112                   | 113                 | 1      | 0.15              | 84                    | 82                  | -2     |
| 0.10 | 0.80 | 0.025       | 84                    | 84                  | 0      | 0.15              | 51                    | 44                  | -14    |
| 0.10 | 0.85 | 0.025       | 63                    | 63                  | 0      | 0.15              | 42                    | 32                  | -24    |
| 0.10 | 0.90 | 0.025       | 40                    | 40                  | 0      | 0.15              | 37                    | 24                  | -35    |
| 0.30 | 0.64 | 0.025       | 174                   | 172                 | -1     | 0.15              | 274                   | 274                 | 0      |
| 0.30 | 0.72 | 0.025       | 147                   | 145                 | -1     | 0.15              | 124                   | 121                 | -2     |
| 0.30 | 0.80 | 0.025       | 108                   | 108                 | 0      | 0.15              | 80                    | 72                  | -10    |
| 0.30 | 0.85 | 0.025       | 80                    | 81                  | 1      | 0.15              | 70                    | 57                  | -19    |
| 0.30 | 0.90 | 0.025       | 52                    | 52                  | 0      | 0.15              | 67                    | 46                  | -31    |

Table S3. DGM1. Type I error and power to detect a statistically significant difference,  $d$ , from a target value of the C-statistic calculated over 10,000 simulations for true prevalence values 5%, 10% and 30% and true C-statistic of 0.64, 0.72 and 0.8 when  $\hat{n}_{req,app}$  is chosen to give 90% power.  $\hat{n}_{req,app}^{(e)}$  denotes the required number of events.

| $d$  | $p$  | $C_0$ | $C_1$ | $\hat{n}_{req,app}^{(e)}$ | Type I error | Power |
|------|------|-------|-------|---------------------------|--------------|-------|
| 0.03 | 0.05 | 0.64  | 0.67  | 736                       | 0.05         | 0.90  |
|      |      | 0.72  | 0.75  | 610                       | 0.06         | 0.91  |
|      |      | 0.80  | 0.83  | 441                       | 0.06         | 0.90  |
| 0.03 | 0.10 | 0.64  | 0.67  | 777                       | 0.05         | 0.90  |
|      |      | 0.72  | 0.75  | 644                       | 0.06         | 0.90  |
|      |      | 0.80  | 0.83  | 466                       | 0.06         | 0.91  |
| 0.03 | 0.30 | 0.64  | 0.67  | 999                       | 0.05         | 0.90  |
|      |      | 0.72  | 0.75  | 828                       | 0.05         | 0.90  |
|      |      | 0.80  | 0.83  | 599                       | 0.06         | 0.91  |
| 0.05 | 0.05 | 0.64  | 0.69  | 261                       | 0.05         | 0.90  |
|      |      | 0.72  | 0.77  | 213                       | 0.06         | 0.91  |
|      |      | 0.80  | 0.85  | 151                       | 0.06         | 0.91  |
| 0.05 | 0.10 | 0.64  | 0.69  | 275                       | 0.06         | 0.90  |
|      |      | 0.72  | 0.77  | 225                       | 0.06         | 0.91  |
|      |      | 0.80  | 0.85  | 159                       | 0.07         | 0.92  |
| 0.05 | 0.30 | 0.64  | 0.69  | 354                       | 0.05         | 0.90  |
|      |      | 0.72  | 0.77  | 290                       | 0.06         | 0.91  |
|      |      | 0.80  | 0.85  | 205                       | 0.06         | 0.92  |

Table S4. DGM 2. % Bias of  $SE_{app}(\hat{C})$  and  $SE_{app}(\hat{\beta}_{CS})$  calculated over 10,000 simulations for true prevalence values 5%, 10% and 30% and true C-statistic of 0.64, 0.72, 0.8, 0.85 and 0.9.

| $p$  | $C$  | $n_{events}$ | C-statistic |            |        | Calibration Slope |            |        |
|------|------|--------------|-------------|------------|--------|-------------------|------------|--------|
|      |      |              | $SE_{true}$ | $SE_{app}$ | % Bias | $SE_{true}$       | $SE_{app}$ | % Bias |
| 0.05 | 0.64 | 50           | 0.0411      | 0.0398     | -3     | 0.2994            | 0.2897     | -3     |
|      |      | 100          | 0.0277      | 0.0281     | 1      | 0.2035            | 0.2048     | 1      |
|      |      | 200          | 0.0199      | 0.0199     | 0      | 0.1465            | 0.1448     | -1     |
|      |      | 400          | 0.0142      | 0.0141     | -1     | 0.1037            | 0.1024     | -1     |
| 0.05 | 0.72 | 50           | 0.0372      | 0.0365     | -2     | 0.1906            | 0.1816     | -5     |
|      |      | 100          | 0.0255      | 0.0258     | 1      | 0.1294            | 0.1284     | -1     |
|      |      | 200          | 0.0183      | 0.0183     | 0      | 0.0932            | 0.0908     | -3     |
|      |      | 400          | 0.0130      | 0.0129     | -1     | 0.0658            | 0.0642     | -2     |
| 0.05 | 0.8  | 50           | 0.0321      | 0.0315     | -2     | 0.1415            | 0.1299     | -8     |
|      |      | 100          | 0.0220      | 0.0223     | 1      | 0.0965            | 0.0918     | -5     |
|      |      | 200          | 0.0158      | 0.0158     | 0      | 0.0692            | 0.0649     | -6     |
|      |      | 400          | 0.0112      | 0.0111     | -1     | 0.0487            | 0.0459     | -6     |
| 0.05 | 0.85 | 50           | 0.0277      | 0.0272     | -2     | 0.1244            | 0.1086     | -13    |
|      |      | 100          | 0.019       | 0.0192     | 1      | 0.0851            | 0.0768     | -10    |
|      |      | 200          | 0.0137      | 0.0136     | -1     | 0.0607            | 0.0543     | -11    |
|      |      | 400          | 0.0097      | 0.0096     | 0      | 0.0426            | 0.0384     | -10    |
| 0.05 | 0.9  | 50           | 0.022       | 0.0217     | -1     | 0.1149            | 0.0917     | -20    |
|      |      | 100          | 0.0152      | 0.0154     | 1      | 0.0785            | 0.0649     | -17    |
|      |      | 200          | 0.0109      | 0.0109     | -1     | 0.0558            | 0.0459     | -18    |
|      |      | 400          | 0.0077      | 0.0077     | 0      | 0.0389            | 0.0324     | -17    |
| 0.1  | 0.64 | 50           | 0.0416      | 0.0409     | -2     | 0.3038            | 0.3008     | -1     |
|      |      | 100          | 0.0291      | 0.0289     | -1     | 0.2184            | 0.2127     | -3     |
|      |      | 200          | 0.0201      | 0.0204     | 2      | 0.1486            | 0.1504     | 1      |
|      |      | 400          | 0.0141      | 0.0144     | 2      | 0.1059            | 0.1063     | 0      |
| 0.1  | 0.72 | 50           | 0.0375      | 0.0375     | 0      | 0.1972            | 0.1916     | -3     |
|      |      | 100          | 0.0267      | 0.0265     | -1     | 0.1413            | 0.1355     | -4     |
|      |      | 200          | 0.0184      | 0.0188     | 2      | 0.0959            | 0.0958     | 0      |
|      |      | 400          | 0.0130      | 0.0133     | 2      | 0.0686            | 0.0677     | -1     |
| 0.1  | 0.8  | 50           | 0.0325      | 0.0324     | 0      | 0.1511            | 0.1404     | -7     |
|      |      | 100          | 0.0230      | 0.0229     | -1     | 0.1075            | 0.0992     | -8     |
|      |      | 200          | 0.0158      | 0.0162     | 2      | 0.0732            | 0.0702     | -4     |
|      |      | 400          | 0.0112      | 0.0114     | 2      | 0.0521            | 0.0496     | -5     |
| 0.1  | 0.85 | 50           | 0.0282      | 0.028      | -1     | 0.136             | 0.1198     | -12    |
|      |      | 100          | 0.0199      | 0.0198     | 0      | 0.0959            | 0.0847     | -12    |
|      |      | 200          | 0.0137      | 0.014      | 2      | 0.0656            | 0.0599     | -9     |
|      |      | 400          | 0.0097      | 0.0099     | 2      | 0.0464            | 0.0423     | -9     |
| 0.1  | 0.9  | 50           | 0.0225      | 0.0223     | -1     | 0.1287            | 0.1038     | -19    |
|      |      | 100          | 0.0158      | 0.0158     | 0      | 0.0895            | 0.0734     | -18    |
|      |      | 200          | 0.011       | 0.0112     | 2      | 0.0618            | 0.0519     | -16    |
|      |      | 400          | 0.0078      | 0.0079     | 1      | 0.0433            | 0.0367     | -15    |

|     |      |     |        |        |    |        |        |     |
|-----|------|-----|--------|--------|----|--------|--------|-----|
| 0.3 | 0.64 | 50  | 0.0468 | 0.0463 | -1 | 0.3622 | 0.3512 | -3  |
|     |      | 100 | 0.0323 | 0.0328 | 1  | 0.2478 | 0.2482 | 0   |
|     |      | 200 | 0.0233 | 0.0232 | 0  | 0.1775 | 0.1755 | -1  |
|     |      | 400 | 0.0163 | 0.0164 | 0  | 0.1244 | 0.1241 | 0   |
| 0.3 | 0.72 | 50  | 0.0423 | 0.0426 | 1  | 0.2438 | 0.2328 | -5  |
|     |      | 100 | 0.0296 | 0.0301 | 1  | 0.1668 | 0.1645 | -1  |
|     |      | 200 | 0.0214 | 0.0213 | 0  | 0.1189 | 0.1163 | -2  |
|     |      | 400 | 0.0149 | 0.0150 | 1  | 0.0829 | 0.0822 | -1  |
| 0.3 | 0.8  | 50  | 0.0363 | 0.0367 | 1  | 0.1952 | 0.1798 | -8  |
|     |      | 100 | 0.0256 | 0.0260 | 1  | 0.1328 | 0.127  | -4  |
|     |      | 200 | 0.0185 | 0.0184 | -1 | 0.0941 | 0.0897 | -5  |
|     |      | 400 | 0.0128 | 0.0130 | 1  | 0.0652 | 0.0634 | -3  |
| 0.3 | 0.85 | 50  | 0.0313 | 0.0317 | 1  | 0.1807 | 0.1595 | -12 |
|     |      | 100 | 0.0222 | 0.0224 | 1  | 0.1222 | 0.1126 | -8  |
|     |      | 200 | 0.0159 | 0.0159 | 0  | 0.086  | 0.0796 | -7  |
|     |      | 400 | 0.0111 | 0.0112 | 1  | 0.0594 | 0.0563 | -5  |
| 0.3 | 0.9  | 50  | 0.025  | 0.0253 | 1  | 0.1765 | 0.1444 | -18 |
|     |      | 100 | 0.0178 | 0.0179 | 1  | 0.1179 | 0.1019 | -14 |
|     |      | 200 | 0.0127 | 0.0126 | 0  | 0.0822 | 0.072  | -12 |
|     |      | 400 | 0.0088 | 0.0089 | 1  | 0.0567 | 0.0509 | -10 |



Table S5. DGM3. % Bias of the standard errors for  $\hat{C}$ ,  $\hat{\beta}_{cs}$  and  $\hat{\alpha}_{CL}$  calculated over 10,000 simulations for true prevalence values 5%, 10% and 30% and true C-statistic of 0.64, 0.72, 0.8, 0.85 and 0.9

|      |      |       | C-statistic        |                   |                            |                  |                           | Calibration slope  |                   |                             |                  |                            | Calibration in the large |                   |                             |                  |                            |
|------|------|-------|--------------------|-------------------|----------------------------|------------------|---------------------------|--------------------|-------------------|-----------------------------|------------------|----------------------------|--------------------------|-------------------|-----------------------------|------------------|----------------------------|
| $p$  | $C$  | $n_e$ | SE <sub>true</sub> | SE <sub>app</sub> | %Bias<br>SE <sub>app</sub> | SE <sub>NI</sub> | %Bias<br>SE <sub>NI</sub> | SE <sub>true</sub> | SE <sub>app</sub> | % Bias<br>SE <sub>app</sub> | SE <sub>NI</sub> | % Bias<br>SE <sub>NI</sub> | SE <sub>true</sub>       | SE <sub>app</sub> | % Bias<br>SE <sub>app</sub> | SE <sub>NI</sub> | % Bias<br>SE <sub>NI</sub> |
| 0.05 | 0.64 | 50    | 0.0405             | 0.0398            | -2                         | 0.0401           | -1                        | 0.295              | 0.290             | -2                          | 0.291            | -1                         | 0.145                    | 0.146             | 1                           | 0.146            | 1                          |
|      |      | 100   | 0.0283             | 0.0281            | -1                         | 0.0282           | 0                         | 0.205              | 0.205             | 0                           | 0.206            | 0                          | 0.104                    | 0.103             | -1                          | 0.103            | -1                         |
|      |      | 200   | 0.0199             | 0.0199            | 0                          | 0.0201           | 1                         | 0.147              | 0.145             | -1                          | 0.145            | -1                         | 0.074                    | 0.073             | -2                          | 0.073            | -2                         |
|      |      | 400   | 0.0140             | 0.0141            | 0                          | 0.0142           | 1                         | 0.103              | 0.102             | -1                          | 0.103            | -1                         | 0.053                    | 0.052             | -2                          | 0.052            | -2                         |
| 0.05 | 0.72 | 50    | 0.0372             | 0.0366            | -2                         | 0.0368           | -1                        | 0.188              | 0.183             | -3                          | 0.186            | -1                         | 0.148                    | 0.148             | 0                           | 0.148            | 0                          |
|      |      | 100   | 0.0260             | 0.0259            | 0                          | 0.0259           | 0                         | 0.134              | 0.129             | -4                          | 0.132            | -2                         | 0.106                    | 0.104             | -1                          | 0.105            | -1                         |
|      |      | 200   | 0.0184             | 0.0183            | -1                         | 0.0183           | -1                        | 0.093              | 0.091             | -2                          | 0.093            | 0                          | 0.074                    | 0.074             | 0                           | 0.074            | 0                          |
|      |      | 400   | 0.0130             | 0.0129            | -1                         | 0.0129           | 0                         | 0.066              | 0.064             | -3                          | 0.066            | -1                         | 0.053                    | 0.052             | -1                          | 0.052            | 0                          |
| 0.05 | 0.8  | 50    | 0.0318             | 0.0316            | -1                         | 0.0313           | -2                        | 0.142              | 0.131             | -8                          | 0.141            | -1                         | 0.155                    | 0.154             | -1                          | 0.154            | -1                         |
|      |      | 100   | 0.0225             | 0.0223            | -1                         | 0.0224           | 0                         | 0.100              | 0.093             | -7                          | 0.100            | 0                          | 0.109                    | 0.109             | 0                           | 0.109            | 0                          |
|      |      | 200   | 0.0157             | 0.0158            | 0                          | 0.0158           | 0                         | 0.069              | 0.065             | -6                          | 0.070            | 1                          | 0.076                    | 0.076             | 0                           | 0.076            | 0                          |
|      |      | 400   | 0.0111             | 0.0112            | 0                          | 0.0111           | 0                         | 0.048              | 0.046             | -5                          | 0.050            | 2                          | 0.054                    | 0.054             | -1                          | 0.054            | -1                         |
| 0.05 | 0.85 | 50    | 0.0274             | 0.0275            | 0                          | 0.0269           | -2                        | 0.126              | 0.110             | -13                         | 0.125            | -1                         | 0.160                    | 0.161             | 1                           | 0.159            | 0                          |
|      |      | 100   | 0.0192             | 0.0194            | 1                          | 0.0191           | -1                        | 0.088              | 0.077             | -12                         | 0.088            | 1                          | 0.113                    | 0.114             | 1                           | 0.113            | 0                          |
|      |      | 200   | 0.0135             | 0.0137            | 2                          | 0.0135           | 0                         | 0.062              | 0.055             | -11                         | 0.063            | 1                          | 0.079                    | 0.080             | 2                           | 0.080            | 1                          |
|      |      | 400   | 0.0096             | 0.0097            | 1                          | 0.0096           | 0                         | 0.043              | 0.039             | -10                         | 0.044            | 3                          | 0.056                    | 0.057             | 1                           | 0.056            | 0                          |

|      |      |     |        |        |    |        |    |       |       |     |       |    |       |       |     |       |
|------|------|-----|--------|--------|----|--------|----|-------|-------|-----|-------|----|-------|-------|-----|-------|
| 0.05 | 0.9  | 50  | 0.0216 | 0.0225 | 4  | 0.0216 | 0  | 0.120 | 0.094 | -21 | 0.118 | -1 | 0.169 | 0.182 | 7   | 0.171 |
|      |      | 100 | 0.0154 | 0.0159 | 3  | 0.0151 | -2 | 0.084 | 0.067 | -21 | 0.084 | 0  | 0.120 | 0.129 | 7   | 0.121 |
|      |      | 200 | 0.0109 | 0.0112 | 3  | 0.0108 | -1 | 0.058 | 0.047 | -18 | 0.059 | 3  | 0.086 | 0.091 | 6   | 0.086 |
|      |      | 400 | 0.0075 | 0.0080 | 6  | 0.0076 | 1  | 0.041 | 0.033 | -19 | 0.042 | 2  | 0.060 | 0.064 | 7   | 0.061 |
| 0.1  | 0.64 | 50  | 0.0422 | 0.0409 | -3 | 0.0410 | -3 | 0.305 | 0.301 | -1  | 0.302 | -1 | 0.154 | 0.151 | -2  | 0.151 |
|      |      | 100 | 0.0290 | 0.0289 | 0  | 0.0290 | 0  | 0.215 | 0.213 | -1  | 0.214 | -1 | 0.107 | 0.106 | -1  | 0.107 |
|      |      | 200 | 0.0205 | 0.0204 | 0  | 0.0205 | 0  | 0.151 | 0.150 | 0   | 0.151 | 0  | 0.076 | 0.075 | -1  | 0.075 |
|      |      | 400 | 0.0145 | 0.0144 | 0  | 0.0145 | 0  | 0.106 | 0.106 | 0   | 0.107 | 0  | 0.053 | 0.053 | 0   | 0.053 |
| 0.1  | 0.72 | 50  | 0.0376 | 0.0376 | 0  | 0.0375 | 0  | 0.200 | 0.193 | -4  | 0.197 | -1 | 0.158 | 0.152 | -4  | 0.154 |
|      |      | 100 | 0.0264 | 0.0266 | 1  | 0.0265 | 0  | 0.142 | 0.135 | -5  | 0.139 | -3 | 0.108 | 0.107 | -1  | 0.109 |
|      |      | 200 | 0.0187 | 0.0188 | 0  | 0.0188 | 1  | 0.098 | 0.096 | -2  | 0.099 | 1  | 0.077 | 0.076 | -2  | 0.077 |
|      |      | 400 | 0.0132 | 0.0133 | 0  | 0.0133 | 0  | 0.069 | 0.068 | -1  | 0.070 | 1  | 0.054 | 0.054 | -1  | 0.055 |
| 0.1  | 0.8  | 50  | 0.0324 | 0.0325 | 0  | 0.0324 | 0  | 0.157 | 0.142 | -9  | 0.152 | -3 | 0.163 | 0.154 | -5  | 0.162 |
|      |      | 100 | 0.0229 | 0.0229 | 0  | 0.0227 | -1 | 0.108 | 0.100 | -7  | 0.108 | 0  | 0.115 | 0.109 | -6  | 0.114 |
|      |      | 200 | 0.0163 | 0.0163 | 0  | 0.0162 | -1 | 0.076 | 0.071 | -7  | 0.076 | 0  | 0.080 | 0.077 | -4  | 0.081 |
|      |      | 400 | 0.0115 | 0.0115 | 0  | 0.0114 | -1 | 0.053 | 0.050 | -7  | 0.054 | 1  | 0.058 | 0.054 | -6  | 0.057 |
| 0.1  | 0.85 | 50  | 0.0278 | 0.0282 | 1  | 0.0278 | 0  | 0.141 | 0.121 | -14 | 0.137 | -3 | 0.172 | 0.155 | -10 | 0.169 |
|      |      | 100 | 0.0196 | 0.0199 | 2  | 0.0195 | -1 | 0.098 | 0.085 | -13 | 0.097 | -1 | 0.121 | 0.110 | -9  | 0.119 |
|      |      | 200 | 0.0138 | 0.0141 | 2  | 0.0138 | 0  | 0.067 | 0.060 | -10 | 0.068 | 2  | 0.085 | 0.078 | -8  | 0.084 |
|      |      | 400 | 0.0097 | 0.0100 | 2  | 0.0098 | 1  | 0.048 | 0.043 | -11 | 0.048 | 1  | 0.060 | 0.055 | -9  | 0.060 |
| 0.1  | 0.9  | 50  | 0.0222 | 0.0229 | 3  | 0.0221 | 0  | 0.136 | 0.105 | -22 | 0.130 | -4 | 0.186 | 0.163 | -12 | 0.181 |
|      |      | 100 | 0.0156 | 0.0161 | 3  | 0.0157 | 1  | 0.091 | 0.074 | -19 | 0.091 | 0  | 0.129 | 0.114 | -11 | 0.127 |

|     |      |     |        |        |    |        |    |       |       |     |       |    |       |       |     |       |
|-----|------|-----|--------|--------|----|--------|----|-------|-------|-----|-------|----|-------|-------|-----|-------|
|     |      | 200 | 0.0110 | 0.0114 | 4  | 0.0109 | -1 | 0.065 | 0.052 | -19 | 0.065 | 0  | 0.091 | 0.081 | -11 | 0.090 |
|     |      | 400 | 0.0077 | 0.0081 | 5  | 0.0077 | 0  | 0.045 | 0.037 | -18 | 0.046 | 1  | 0.065 | 0.057 | -12 | 0.064 |
| 0.3 | 0.64 | 50  | 0.0481 | 0.0463 | -4 | 0.0464 | -4 | 0.369 | 0.351 | -5  | 0.352 | -5 | 0.179 | 0.174 | -3  | 0.174 |
|     |      | 100 | 0.0329 | 0.0327 | -1 | 0.0328 | 0  | 0.251 | 0.248 | -1  | 0.249 | -1 | 0.125 | 0.123 | -1  | 0.123 |
|     |      | 200 | 0.0232 | 0.0231 | 0  | 0.0231 | 0  | 0.176 | 0.176 | 0   | 0.176 | 0  | 0.087 | 0.087 | 0   | 0.087 |
|     |      | 400 | 0.0163 | 0.0164 | 0  | 0.0164 | 1  | 0.126 | 0.123 | -2  | 0.124 | -2 | 0.062 | 0.061 | -1  | 0.061 |
| 0.3 | 0.72 | 50  | 0.0429 | 0.0426 | -1 | 0.0425 | -1 | 0.246 | 0.233 | -5  | 0.235 | -4 | 0.185 | 0.181 | -2  | 0.181 |
|     |      | 100 | 0.0302 | 0.0301 | 0  | 0.0302 | 0  | 0.172 | 0.164 | -5  | 0.166 | -4 | 0.128 | 0.128 | 0   | 0.128 |
|     |      | 200 | 0.0214 | 0.0213 | -1 | 0.0213 | -1 | 0.121 | 0.116 | -4  | 0.118 | -3 | 0.090 | 0.090 | 0   | 0.091 |
|     |      | 400 | 0.0150 | 0.0150 | 0  | 0.0151 | 1  | 0.084 | 0.082 | -2  | 0.083 | -1 | 0.064 | 0.064 | 0   | 0.064 |
| 0.3 | 0.8  | 50  | 0.0370 | 0.0367 | -1 | 0.0364 | -2 | 0.199 | 0.180 | -10 | 0.186 | -7 | 0.196 | 0.190 | -3  | 0.194 |
|     |      | 100 | 0.0260 | 0.0260 | 0  | 0.0258 | -1 | 0.136 | 0.127 | -6  | 0.132 | -3 | 0.138 | 0.134 | -3  | 0.137 |
|     |      | 200 | 0.0184 | 0.0183 | 0  | 0.0183 | -1 | 0.095 | 0.090 | -5  | 0.093 | -1 | 0.097 | 0.095 | -3  | 0.097 |
|     |      | 400 | 0.0130 | 0.0130 | 0  | 0.0129 | -1 | 0.066 | 0.064 | -4  | 0.066 | 0  | 0.069 | 0.067 | -3  | 0.068 |
| 0.3 | 0.85 | 50  | 0.0317 | 0.0318 | 0  | 0.0316 | 0  | 0.185 | 0.160 | -14 | 0.171 | -8 | 0.208 | 0.191 | -8  | 0.206 |
|     |      | 100 | 0.0223 | 0.0225 | 0  | 0.0222 | -1 | 0.123 | 0.113 | -9  | 0.121 | -2 | 0.146 | 0.135 | -8  | 0.145 |
|     |      | 200 | 0.0157 | 0.0159 | 1  | 0.0157 | 0  | 0.087 | 0.080 | -8  | 0.085 | -2 | 0.104 | 0.096 | -8  | 0.103 |
|     |      | 400 | 0.0111 | 0.0112 | 0  | 0.0112 | 0  | 0.060 | 0.056 | -7  | 0.060 | 0  | 0.073 | 0.068 | -7  | 0.073 |
| 0.3 | 0.9  | 50  | 0.0251 | 0.0253 | 1  | 0.0250 | 0  | 0.178 | 0.144 | -19 | 0.163 | -9 | 0.229 | 0.178 | -22 | 0.223 |
|     |      | 100 | 0.0177 | 0.0179 | 1  | 0.0177 | 0  | 0.121 | 0.102 | -15 | 0.115 | -5 | 0.162 | 0.126 | -22 | 0.158 |
|     |      | 200 | 0.0124 | 0.0127 | 2  | 0.0125 | 0  | 0.084 | 0.072 | -14 | 0.081 | -3 | 0.114 | 0.089 | -22 | 0.112 |
|     |      | 400 | 0.0088 | 0.0090 | 2  | 0.0088 | 0  | 0.058 | 0.051 | -12 | 0.058 | -1 | 0.081 | 0.063 | -22 | 0.079 |

Table S6. DGM3. Number of events required to attain a specified standard error for  $\hat{C}$ ,  $\hat{\beta}_{CS}$  and  $\hat{\alpha}_{CL}$ . % Bias of the estimated sample size (and number of events) calculated over 10,000 simulations for true prevalence values 10% and 30% and true C-statistic of 0.64, 0.72, 0.8, 0.85 and 0.9.

| $p$  | $C$  | C-Statistic |                       |                          |        |                          |        | Calibration Slope |                       |                           |        |                          |        | Calibration in the large |                       |                           |        |                          |        |
|------|------|-------------|-----------------------|--------------------------|--------|--------------------------|--------|-------------------|-----------------------|---------------------------|--------|--------------------------|--------|--------------------------|-----------------------|---------------------------|--------|--------------------------|--------|
|      |      | $SE_{req}$  | $\hat{n}_{req}^{(e)}$ | $\hat{n}_{req,ap}^{(e)}$ | % Bias | $\hat{n}_{req,NI}^{(e)}$ | % Bias | $SE_{req}$        | $\hat{n}_{req}^{(e)}$ | $\hat{n}_{req,app}^{(e)}$ | % Bias | $\hat{n}_{req,NI}^{(e)}$ | % Bias | $SE_{req}$               | $\hat{n}_{req}^{(e)}$ | $\hat{n}_{req,app}^{(e)}$ | % Bias | $\hat{n}_{req,NI}^{(e)}$ | % Bias |
| 0.05 | 0.64 | 0.0125      | 513                   | 507                      | -1     | 512                      | 0      | 0.1               | 425                   | 414                       | -3     | 422                      | -1     | 0.1                      | 108                   | 107                       | -1     | 107                      | -1     |
| 0.05 | 0.72 | 0.0125      | 415                   | 427                      | 3      | 424                      | 2      | 0.1               | 176                   | 165                       | -6     | 172                      | -2     | 0.1                      | 111                   | 110                       | -1     | 110                      | -1     |
| 0.05 | 0.80 | 0.0125      | 310                   | 319                      | 3      | 314                      | 1      | 0.1               | 99                    | 84                        | -15    | 94                       | -5     | 0.1                      | 118                   | 117                       | -1     | 117                      | -1     |
| 0.05 | 0.85 | 0.0125      | 235                   | 237                      | 1      | 231                      | -2     | 0.1               | 77                    | 59                        | -23    | 74                       | -4     | 0.1                      | 132                   | 131                       | -1     | 125                      | -6     |
| 0.05 | 0.90 | 0.0125      | 139                   | 153                      | 11     | 144                      | 4      | 0.1               | 66                    | 42                        | -36    | 62                       | -6     | 0.1                      | 165                   | 164                       | -1     | 137                      | -17    |
| 0.10 | 0.64 | 0.0125      | 541                   | 535                      | -1     | 534                      | -1     | 0.1               | 453                   | 453                       | 0      | 456                      | 1      | 0.1                      | 115                   | 114                       | -1     | 114                      | -1     |
| 0.10 | 0.72 | 0.0125      | 447                   | 451                      | 1      | 449                      | 0      | 0.1               | 198                   | 186                       | -6     | 193                      | -2     | 0.1                      | 120                   | 116                       | -3     | 120                      | 0      |
| 0.10 | 0.80 | 0.0125      | 329                   | 339                      | 3      | 333                      | 1      | 0.1               | 118                   | 100                       | -15    | 113                      | -4     | 0.1                      | 130                   | 118                       | -9     | 131                      | 1      |
| 0.10 | 0.85 | 0.0125      | 241                   | 251                      | 4      | 242                      | 0      | 0.1               | 94                    | 72                        | -23    | 90                       | -4     | 0.1                      | 146                   | 121                       | -17    | 141                      | -3     |
| 0.10 | 0.90 | 0.0125      | 148                   | 163                      | 10     | 151                      | 2      | 0.1               | 84                    | 54                        | -36    | 79                       | -5     | 0.1                      | 166                   | 131                       | -21    | 157                      | -5     |
| 0.30 | 0.64 | 0.0125      | 695                   | 687                      | -1     | 693                      | 0      | 0.1               | 625                   | 625                       | 0      | 620                      | -1     | 0.1                      | 153                   | 152                       | -1     | 151                      | -1     |
| 0.30 | 0.72 | 0.0125      | 586                   | 580                      | -1     | 578                      | -1     | 0.1               | 282                   | 276                       | -2     | 277                      | -2     | 0.1                      | 166                   | 165                       | -1     | 166                      | 0      |
| 0.30 | 0.80 | 0.0125      | 420                   | 432                      | 3      | 430                      | 2      | 0.1               | 180                   | 163                       | -9     | 173                      | -4     | 0.1                      | 192                   | 182                       | -5     | 191                      | 0      |
| 0.30 | 0.85 | 0.0125      | 323                   | 326                      | 1      | 321                      | -1     | 0.1               | 149                   | 128                       | -14    | 145                      | -2     | 0.1                      | 216                   | 183                       | -15    | 216                      | 0      |
| 0.30 | 0.90 | 0.0125      | 205                   | 209                      | 2      | 206                      | 0      | 0.1               | 147                   | 105                       | -29    | 134                      | -9     | 0.1                      | 240                   | 160                       | -33    | 253                      | 6      |

|      |      |       |     |     |    |     |    |      |     |     |     |     |     |      |     |    |     |     |     |
|------|------|-------|-----|-----|----|-----|----|------|-----|-----|-----|-----|-----|------|-----|----|-----|-----|-----|
| 0.05 | 0.64 | 0.025 | 129 | 127 | -2 | 129 | 0  | 0.15 | 192 | 187 | -3  | 188 | -2  | 0.15 | 49  | 48 | -2  | 47  | -3  |
| 0.05 | 0.72 | 0.025 | 108 | 107 | -1 | 107 | -1 | 0.15 | 77  | 75  | -3  | 76  | -1  | 0.15 | 50  | 49 | -2  | 49  | -2  |
| 0.05 | 0.80 | 0.025 | 78  | 80  | 3  | 79  | 1  | 0.15 | 46  | 39  | -15 | 43  | -7  | 0.15 | 53  | 52 | -2  | 52  | -2  |
| 0.05 | 0.85 | 0.025 | 58  | 60  | 3  | 56  | -3 | 0.15 | 37  | 27  | -27 | 33  | -12 | 0.15 | 60  | 59 | -2  | 56  | -7  |
| 0.05 | 0.90 | 0.025 | 36  | 39  | 8  | 34  | -6 | 0.15 | 32  | 19  | -41 | 27  | -14 | 0.15 | 74  | 73 | -1  | 61  | -17 |
| 0.10 | 0.64 | 0.025 | 136 | 134 | -1 | 135 | -1 | 0.15 | 209 | 199 | -5  | 202 | -3  | 0.15 | 52  | 51 | -2  | 51  | -2  |
| 0.10 | 0.72 | 0.025 | 112 | 113 | 1  | 113 | 1  | 0.15 | 89  | 83  | -7  | 85  | -4  | 0.15 | 55  | 52 | -5  | 53  | -3  |
| 0.10 | 0.80 | 0.025 | 86  | 85  | -1 | 83  | -3 | 0.15 | 54  | 45  | -17 | 50  | -7  | 0.15 | 58  | 53 | -9  | 58  | 0   |
| 0.10 | 0.85 | 0.025 | 62  | 63  | 2  | 62  | 0  | 0.15 | 44  | 32  | -27 | 40  | -9  | 0.15 | 65  | 54 | -17 | 63  | -3  |
| 0.10 | 0.90 | 0.025 | 39  | 41  | 5  | 37  | -5 | 0.15 | 40  | 25  | -38 | 35  | -12 | 0.15 | 73  | 58 | -21 | 70  | -4  |
| 0.30 | 0.64 | 0.025 | 173 | 172 | -1 | 173 | 0  | 0.15 | 282 | 278 | -1  | 275 | -2  | 0.15 | 70  | 68 | -3  | 67  | -4  |
| 0.30 | 0.72 | 0.025 | 144 | 145 | 1  | 144 | 0  | 0.15 | 125 | 122 | -2  | 123 | -1  | 0.15 | 76  | 74 | -3  | 74  | -3  |
| 0.30 | 0.80 | 0.025 | 110 | 110 | -2 | 107 | -2 | 0.15 | 81  | 73  | -10 | 77  | -5  | 0.15 | 86  | 81 | -6  | 85  | -1  |
| 0.30 | 0.85 | 0.025 | 81  | 81  | 0  | 79  | -2 | 0.15 | 70  | 57  | -19 | 64  | -8  | 0.15 | 97  | 82 | -15 | 96  | -1  |
| 0.30 | 0.90 | 0.025 | 52  | 53  | 2  | 50  | -4 | 0.15 | 69  | 47  | -32 | 60  | -13 | 0.15 | 107 | 71 | -34 | 112 | 5   |

Table S7. DGM3. Type I error and power to detect a statistically significant difference,  $d$ , from a target value of the C-statistic calculated over 10,000 simulations for true prevalence values 5%, 10% and 30% and true C-statistic of 0.64, 0.72, 0.8, 0.85 and 0.9 when  $\hat{n}_{req,app}$  is chosen to give 90% power.  $\hat{n}_{req,app}^{(e)}$  denotes the required number of events.

| $d$  | $p$  | $C_0$ | $C_1$ | $\hat{n}_{req,app}^{(e)}$ | Type I error | Power |
|------|------|-------|-------|---------------------------|--------------|-------|
| 0.03 | 0.05 | 0.64  | 0.67  | 762                       | 0.054        | 0.903 |
|      |      | 0.72  | 0.75  | 626                       | 0.043        | 0.902 |
|      |      | 0.8   | 0.83  | 519                       | 0.043        | 0.916 |
| 0.03 | 0.10 | 0.64  | 0.67  | 777                       | 0.052        | 0.896 |
|      |      | 0.72  | 0.75  | 667                       | 0.045        | 0.905 |
|      |      | 0.8   | 0.83  | 552                       | 0.045        | 0.913 |
| 0.03 | 0.30 | 0.64  | 0.67  | 1015                      | 0.05         | 0.903 |
|      |      | 0.72  | 0.75  | 870                       | 0.042        | 0.914 |
|      |      | 0.8   | 0.83  | 674                       | 0.043        | 0.917 |
| 0.05 | 0.05 | 0.64  | 0.69  | 263                       | 0.049        | 0.901 |
|      |      | 0.72  | 0.77  | 229                       | 0.045        | 0.911 |
|      |      | 0.8   | 0.85  | 175                       | 0.04         | 0.912 |
| 0.05 | 0.10 | 0.64  | 0.69  | 286                       | 0.047        | 0.909 |
|      |      | 0.72  | 0.77  | 245                       | 0.047        | 0.914 |
|      |      | 0.8   | 0.85  | 192                       | 0.045        | 0.92  |
| 0.05 | 0.30 | 0.64  | 0.69  | 355                       | 0.049        | 0.902 |
|      |      | 0.72  | 0.77  | 311                       | 0.047        | 0.911 |
|      |      | 0.8   | 0.85  | 236                       | 0.045        | 0.921 |

Table S8. DGM4. % Bias of  $SE_{app}(\hat{C})$ ,  $SE_{app}(\hat{\beta}_{CS})$ ,  $SE_{app}(\hat{\alpha}_{CL})$ ,  $SE_{MC}(\hat{\beta}_{CS})$  and  $SE_{MC}(\hat{\alpha}_{CL})$  calculated over 10,000 simulations for true prevalence values 5%, 10% and 30% and true C-statistic of 0.64, 0.72, 0.8, 0.85 and 0.9.

| $p$  | $C$  | $n_{events}$ | C-Statistic |            |                      | Calibration Slope |            |                      |           |                     | Calibration in the large |            |                      |           |                     |
|------|------|--------------|-------------|------------|----------------------|-------------------|------------|----------------------|-----------|---------------------|--------------------------|------------|----------------------|-----------|---------------------|
|      |      |              | $SE_{true}$ | $SE_{app}$ | % Bias<br>$SE_{app}$ | $SE_{true}$       | $SE_{app}$ | % Bias<br>$SE_{app}$ | $SE_{NI}$ | % Bias<br>$SE_{NI}$ | $SE_{true}$              | $SE_{app}$ | % Bias<br>$SE_{app}$ | $SE_{NI}$ | % Bias<br>$SE_{NI}$ |
| 0.05 | 0.64 | 50           | 0.043       | 0.040      | -5                   | 0.267             | 0.293      | 10                   | 0.293     | 10                  | 0.151                    | 0.148      | -2                   | 0.148     | -2                  |
|      |      | 100          | 0.030       | 0.029      | -4                   | 0.185             | 0.208      | 12                   | 0.210     | 13                  | 0.106                    | 0.105      | -2                   | 0.105     | -1                  |
|      |      | 200          | 0.021       | 0.020      | -4                   | 0.131             | 0.147      | 12                   | 0.148     | 12                  | 0.076                    | 0.074      | -2                   | 0.074     | -2                  |
|      |      | 400          | 0.015       | 0.014      | -4                   | 0.092             | 0.104      | 13                   | 0.104     | 13                  | 0.053                    | 0.052      | -2                   | 0.052     | -1                  |
| 0.05 | 0.72 | 50           | 0.038       | 0.036      | -5                   | 0.171             | 0.180      | 5                    | 0.184     | 8                   | 0.148                    | 0.146      | -1                   | 0.146     | -1                  |
|      |      | 100          | 0.027       | 0.025      | -4                   | 0.119             | 0.127      | 7                    | 0.130     | 9                   | 0.104                    | 0.103      | -1                   | 0.103     | 0                   |
|      |      | 200          | 0.019       | 0.018      | -4                   | 0.084             | 0.090      | 7                    | 0.092     | 9                   | 0.072                    | 0.073      | -1                   | 0.073     | 1                   |
|      |      | 400          | 0.013       | 0.013      | -5                   | 0.060             | 0.064      | 7                    | 0.065     | 9                   | 0.052                    | 0.051      | 1                    | 0.052     | 0                   |
| 0.05 | 0.8  | 50           | 0.034       | 0.031      | -8                   | 0.125             | 0.127      | 2                    | 0.138     | 10                  | 0.158                    | 0.153      | -1                   | 0.153     | -3                  |
|      |      | 100          | 0.024       | 0.022      | -8                   | 0.088             | 0.090      | 3                    | 0.096     | 10                  | 0.110                    | 0.108      | -3                   | 0.108     | -2                  |
|      |      | 200          | 0.017       | 0.016      | -8                   | 0.062             | 0.064      | 3                    | 0.069     | 12                  | 0.078                    | 0.076      | -2                   | 0.076     | -2                  |
|      |      | 400          | 0.012       | 0.011      | -7                   | 0.043             | 0.045      | 4                    | 0.049     | 13                  | 0.055                    | 0.054      | -2                   | 0.054     | -1                  |
| 0.05 | 0.85 | 50           | 0.031       | 0.028      | -12                  | 0.111             | 0.110      | 0                    | 0.125     | 13                  | 0.165                    | 0.161      | -2                   | 0.159     | -3                  |
|      |      | 100          | 0.022       | 0.020      | -12                  | 0.078             | 0.078      | 1                    | 0.089     | 14                  | 0.116                    | 0.114      | -2                   | 0.112     | -3                  |
|      |      | 200          | 0.016       | 0.014      | -11                  | 0.055             | 0.055      | 0                    | 0.063     | 14                  | 0.083                    | 0.080      | -2                   | 0.080     | -4                  |
|      |      | 400          | 0.011       | 0.010      | -11                  | 0.038             | 0.039      | 2                    | 0.045     | 17                  | 0.058                    | 0.057      | -3                   | 0.057     | -2                  |
| 0.05 | 0.9  | 50           | 0.025       | 0.021      | -17                  | 0.098             | 0.089      | -10                  | 0.113     | 15                  | 0.174                    | 0.171      | -2                   | 0.164     | -6                  |

|     |      |     |       |       |     |       |       |     |       |    |       |       |     |       |     |
|-----|------|-----|-------|-------|-----|-------|-------|-----|-------|----|-------|-------|-----|-------|-----|
|     |      | 100 | 0.017 | 0.015 | -16 | 0.068 | 0.063 | -7  | 0.080 | 18 | 0.121 | 0.121 | -2  | 0.116 | -5  |
|     |      | 200 | 0.012 | 0.010 | -17 | 0.048 | 0.044 | -8  | 0.057 | 18 | 0.086 | 0.086 | 0   | 0.082 | -5  |
|     |      | 400 | 0.009 | 0.007 | -17 | 0.034 | 0.031 | -7  | 0.040 | 19 | 0.061 | 0.061 | -1  | 0.058 | -5  |
| 0.1 | 0.64 | 50  | 0.041 | 0.040 | -3  | 0.268 | 0.287 | 7   | 0.289 | 8  | 0.151 | 0.148 | -1  | 0.149 | -2  |
|     |      | 100 | 0.030 | 0.028 | -4  | 0.188 | 0.204 | 9   | 0.205 | 9  | 0.106 | 0.105 | -2  | 0.105 | -1  |
|     |      | 200 | 0.021 | 0.020 | -3  | 0.131 | 0.144 | 10  | 0.145 | 10 | 0.075 | 0.074 | -1  | 0.074 | -1  |
|     |      | 400 | 0.015 | 0.014 | -4  | 0.094 | 0.102 | 8   | 0.102 | 9  | 0.052 | 0.052 | -1  | 0.053 | 0   |
| 0.1 | 0.72 | 50  | 0.039 | 0.038 | -4  | 0.184 | 0.192 | 4   | 0.195 | 6  | 0.158 | 0.152 | 0   | 0.155 | -2  |
|     |      | 100 | 0.028 | 0.027 | -5  | 0.129 | 0.135 | 4   | 0.138 | 7  | 0.111 | 0.108 | -3  | 0.109 | -2  |
|     |      | 200 | 0.020 | 0.019 | -5  | 0.090 | 0.095 | 6   | 0.097 | 8  | 0.079 | 0.076 | -3  | 0.078 | -2  |
|     |      | 400 | 0.014 | 0.013 | -4  | 0.064 | 0.068 | 6   | 0.069 | 8  | 0.055 | 0.054 | -3  | 0.055 | 0   |
| 0.1 | 0.8  | 50  | 0.035 | 0.032 | -7  | 0.141 | 0.140 | 0   | 0.151 | 7  | 0.164 | 0.153 | -2  | 0.161 | -2  |
|     |      | 100 | 0.024 | 0.023 | -6  | 0.098 | 0.099 | 2   | 0.107 | 10 | 0.117 | 0.108 | -7  | 0.114 | -3  |
|     |      | 200 | 0.017 | 0.016 | -7  | 0.069 | 0.070 | 2   | 0.076 | 10 | 0.084 | 0.076 | -8  | 0.081 | -4  |
|     |      | 400 | 0.012 | 0.011 | -6  | 0.048 | 0.050 | 3   | 0.053 | 11 | 0.059 | 0.054 | -9  | 0.057 | -3  |
| 0.1 | 0.85 | 50  | 0.030 | 0.027 | -10 | 0.124 | 0.118 | -5  | 0.135 | 8  | 0.178 | 0.152 | -8  | 0.167 | -6  |
|     |      | 100 | 0.021 | 0.019 | -10 | 0.086 | 0.084 | -2  | 0.095 | 11 | 0.122 | 0.108 | -12 | 0.118 | -3  |
|     |      | 200 | 0.015 | 0.014 | -9  | 0.061 | 0.059 | -3  | 0.067 | 11 | 0.087 | 0.076 | -12 | 0.083 | -4  |
|     |      | 400 | 0.011 | 0.010 | -10 | 0.043 | 0.042 | -2  | 0.048 | 12 | 0.062 | 0.054 | -13 | 0.059 | -4  |
| 0.1 | 0.9  | 50  | 0.026 | 0.022 | -15 | 0.115 | 0.102 | -11 | 0.127 | 10 | 0.200 | 0.160 | -20 | 0.180 | -10 |
|     |      | 100 | 0.018 | 0.015 | -15 | 0.080 | 0.072 | -9  | 0.090 | 13 | 0.139 | 0.113 | -19 | 0.127 | -9  |
|     |      | 200 | 0.013 | 0.011 | -16 | 0.055 | 0.051 | -7  | 0.064 | 15 | 0.098 | 0.080 | -18 | 0.090 | -9  |



|     |     |       |       |     |       |       |     |       |    |       |       |     |       |    |
|-----|-----|-------|-------|-----|-------|-------|-----|-------|----|-------|-------|-----|-------|----|
|     | 400 | 0.009 | 0.008 | -16 | 0.039 | 0.036 | -7  | 0.045 | 16 | 0.070 | 0.057 | -19 | 0.064 | -9 |
| 0.3 | 50  | 0.047 | 0.046 | -3  | 0.346 | 0.351 | 1   | 0.351 | 1  | 0.173 | 0.172 | -1  | 0.172 | -1 |
|     | 100 | 0.033 | 0.033 | -1  | 0.239 | 0.249 | 4   | 0.250 | 4  | 0.125 | 0.122 | -2  | 0.122 | -2 |
|     | 200 | 0.023 | 0.023 | -1  | 0.167 | 0.176 | 5   | 0.177 | 6  | 0.087 | 0.086 | 0   | 0.086 | 0  |
|     | 400 | 0.016 | 0.016 | 0   | 0.117 | 0.125 | 7   | 0.125 | 7  | 0.062 | 0.061 | -2  | 0.061 | -2 |
| 0.3 | 50  | 0.043 | 0.042 | -3  | 0.232 | 0.230 | -1  | 0.233 | 1  | 0.183 | 0.180 | -2  | 0.180 | -2 |
|     | 100 | 0.030 | 0.030 | -2  | 0.159 | 0.163 | 3   | 0.165 | 4  | 0.130 | 0.127 | -2  | 0.127 | -1 |
|     | 200 | 0.021 | 0.021 | -2  | 0.111 | 0.115 | 4   | 0.117 | 5  | 0.091 | 0.090 | -1  | 0.090 | -2 |
|     | 400 | 0.015 | 0.015 | -2  | 0.079 | 0.081 | 3   | 0.082 | 4  | 0.064 | 0.064 | -1  | 0.064 | -1 |
| 0.3 | 50  | 0.039 | 0.037 | -4  | 0.191 | 0.182 | -4  | 0.189 | -1 | 0.198 | 0.189 | -4  | 0.193 | -1 |
|     | 100 | 0.027 | 0.026 | -3  | 0.131 | 0.128 | -2  | 0.133 | 2  | 0.140 | 0.134 | -4  | 0.137 | -2 |
|     | 200 | 0.019 | 0.019 | -3  | 0.091 | 0.091 | 0   | 0.094 | 4  | 0.099 | 0.095 | -5  | 0.097 | -3 |
|     | 400 | 0.013 | 0.013 | -2  | 0.063 | 0.064 | 1   | 0.067 | 5  | 0.070 | 0.067 | -4  | 0.068 | -3 |
| 0.3 | 50  | 0.033 | 0.032 | -4  | 0.181 | 0.160 | -11 | 0.171 | -5 | 0.215 | 0.192 | -11 | 0.205 | -2 |
|     | 100 | 0.023 | 0.023 | -4  | 0.122 | 0.113 | -8  | 0.121 | -1 | 0.151 | 0.136 | -10 | 0.145 | -5 |
|     | 200 | 0.016 | 0.016 | -3  | 0.084 | 0.080 | -5  | 0.085 | 1  | 0.105 | 0.096 | -9  | 0.103 | -4 |
|     | 400 | 0.012 | 0.011 | -3  | 0.059 | 0.056 | -4  | 0.060 | 3  | 0.075 | 0.068 | -10 | 0.073 | -3 |
| 0.3 | 50  | 0.028 | 0.026 | -8  | 0.174 | 0.145 | -17 | 0.164 | -6 | 0.236 | 0.177 | -25 | 0.224 | -4 |
|     | 100 | 0.020 | 0.018 | -9  | 0.116 | 0.102 | -11 | 0.116 | 0  | 0.167 | 0.125 | -25 | 0.158 | -5 |
|     | 200 | 0.014 | 0.013 | -7  | 0.080 | 0.072 | -10 | 0.082 | 2  | 0.119 | 0.088 | -26 | 0.112 | -5 |
|     | 400 | 0.010 | 0.009 | -8  | 0.056 | 0.051 | -8  | 0.058 | 4  | 0.085 | 0.062 | -27 | 0.079 | -6 |

Table S9. Survival data –Random Censoring. % Bias of  $SE_{app}(\hat{C})$  and  $SE_{app}(\hat{\beta}_{CS})$  obtained from the formulae for binary data and calculated over 10,000 simulations for true prevalence values 5%, 10% and 30% and true C-index of 0.64, 0.72, 0.8, 0.85 and 0.9.

| $p$  | $C$  | $n_{events}$ | C-statistic |            | % Bias<br>( $SE_{app}$ ) | Calibration Slope |            | % Bias<br>( $SE_{app}$ ) |
|------|------|--------------|-------------|------------|--------------------------|-------------------|------------|--------------------------|
|      |      |              | $SE_{true}$ | $SE_{app}$ |                          | $SE_{true}$       | $SE_{app}$ |                          |
| 0.05 | 0.64 | 50           | 0.0443      | 0.0396     | -11                      | 0.2750            | 0.2820     | 3                        |
|      |      | 100          | 0.0322      | 0.0280     | -13                      | 0.2000            | 0.1990     | -1                       |
|      |      | 200          | 0.0219      | 0.0198     | -10                      | 0.1360            | 0.1410     | 4                        |
|      |      | 400          | 0.0158      | 0.0140     | -11                      | 0.0970            | 0.1000     | 3                        |
| 0.05 | 0.72 | 50           | 0.0410      | 0.0364     | -11                      | 0.1790            | 0.1800     | 1                        |
|      |      | 100          | 0.0288      | 0.0256     | -11                      | 0.1230            | 0.1270     | 3                        |
|      |      | 200          | 0.0202      | 0.0181     | -10                      | 0.0860            | 0.0900     | 5                        |
|      |      | 400          | 0.0142      | 0.0128     | -10                      | 0.0610            | 0.0630     | 3                        |
| 0.05 | 0.80 | 50           | 0.0336      | 0.0308     | -8                       | 0.1270            | 0.1270     | 0                        |
|      |      | 100          | 0.0240      | 0.0218     | -9                       | 0.0870            | 0.0900     | 3                        |
|      |      | 200          | 0.0167      | 0.0154     | -8                       | 0.0610            | 0.0630     | 3                        |
|      |      | 400          | 0.0119      | 0.0109     | -8                       | 0.0430            | 0.0450     | 5                        |
| 0.05 | 0.85 | 50           | 0.0287      | 0.0264     | -8                       | 0.1090            | 0.1075     | -1                       |
|      |      | 100          | 0.0199      | 0.0187     | -6                       | 0.0742            | 0.0754     | 2                        |
|      |      | 200          | 0.0141      | 0.0132     | -6                       | 0.0522            | 0.0532     | 2                        |
|      |      | 400          | 0.01        | 0.0094     | -6                       | 0.0364            | 0.0375     | 3                        |
| 0.05 | 0.90 | 50           | 0.0223      | 0.0219     | -2                       | 0.0976            | 0.0920     | -6                       |
|      |      | 100          | 0.0155      | 0.0154     | -1                       | 0.0661            | 0.0649     | -2                       |
|      |      | 200          | 0.0111      | 0.0109     | -2                       | 0.0464            | 0.0458     | -1                       |
|      |      | 400          | 0.0078      | 0.0077     | -2                       | 0.0326            | 0.0324     | -1                       |
| 0.10 | 0.64 | 50           | 0.0457      | 0.0412     | -10                      | 0.3020            | 0.3110     | 3                        |
|      |      | 100          | 0.0317      | 0.0291     | -8                       | 0.2060            | 0.2180     | 6                        |
|      |      | 200          | 0.0222      | 0.0205     | -8                       | 0.1430            | 0.1540     | 8                        |
|      |      | 400          | 0.0157      | 0.0145     | -8                       | 0.1010            | 0.1090     | 8                        |
| 0.10 | 0.72 | 50           | 0.0403      | 0.0367     | -9                       | 0.1790            | 0.1880     | 5                        |
|      |      | 100          | 0.0278      | 0.0259     | -7                       | 0.1230            | 0.1320     | 7                        |
|      |      | 200          | 0.0197      | 0.0183     | -7                       | 0.0870            | 0.0930     | 7                        |
|      |      | 400          | 0.0138      | 0.0129     | -7                       | 0.0610            | 0.0660     | 8                        |
| 0.10 | 0.80 | 50           | 0.035       | 0.0331     | -5                       | 0.1380            | 0.1460     | 6                        |
|      |      | 100          | 0.0247      | 0.0234     | -5                       | 0.0950            | 0.1030     | 8                        |
|      |      | 200          | 0.0175      | 0.0165     | -6                       | 0.0660            | 0.0730     | 11                       |
|      |      | 400          | 0.0123      | 0.0117     | -5                       | 0.0470            | 0.0510     | 9                        |
| 0.10 | 0.85 | 50           | 0.0282      | 0.0276     | -2                       | 0.1131            | 0.1204     | 6                        |
|      |      | 100          | 0.0199      | 0.0195     | -2                       | 0.0783            | 0.0846     | 8                        |
|      |      | 200          | 0.0139      | 0.0138     | -1                       | 0.0549            | 0.0596     | 9                        |
|      |      | 400          | 0.0099      | 0.0098     | -1                       | 0.0382            | 0.0421     | 10                       |

|      |      |     |        |        |    |        |        |    |
|------|------|-----|--------|--------|----|--------|--------|----|
| 0.10 | 0.90 | 50  | 0.0215 | 0.0223 | 4  | 0.1007 | 0.1040 | 3  |
|      |      | 100 | 0.0150 | 0.0157 | 5  | 0.0684 | 0.0731 | 7  |
|      |      | 200 | 0.0107 | 0.0111 | 4  | 0.0474 | 0.0517 | 9  |
|      |      | 400 | 0.0074 | 0.0079 | 7  | 0.0336 | 0.0365 | 9  |
| 0.20 | 0.64 | 50  | 0.0453 | 0.0431 | -5 | 0.2960 | 0.3250 | 10 |
|      |      | 100 | 0.0313 | 0.0305 | -3 | 0.2020 | 0.2290 | 13 |
|      |      | 200 | 0.0223 | 0.0216 | -3 | 0.1420 | 0.1610 | 13 |
|      |      | 400 | 0.0158 | 0.0153 | -3 | 0.0990 | 0.1130 | 14 |
| 0.20 | 0.72 | 50  | 0.0397 | 0.0393 | -1 | 0.1850 | 0.2130 | 15 |
|      |      | 100 | 0.0276 | 0.0278 | 1  | 0.1280 | 0.1490 | 16 |
|      |      | 200 | 0.0194 | 0.0196 | 1  | 0.0880 | 0.1050 | 19 |
|      |      | 400 | 0.0138 | 0.0139 | 1  | 0.0620 | 0.0740 | 19 |
| 0.20 | 0.80 | 50  | 0.0325 | 0.0336 | 3  | 0.1340 | 0.1580 | 18 |
|      |      | 100 | 0.0229 | 0.0237 | 3  | 0.0930 | 0.1110 | 19 |
|      |      | 200 | 0.0163 | 0.0168 | 3  | 0.0650 | 0.0780 | 20 |
|      |      | 400 | 0.0112 | 0.0118 | 5  | 0.0450 | 0.0550 | 22 |
| 0.20 | 0.85 | 50  | 0.0276 | 0.0294 | 7  | 0.1205 | 0.1420 | 18 |
|      |      | 100 | 0.0193 | 0.0208 | 8  | 0.0826 | 0.0996 | 21 |
|      |      | 200 | 0.0136 | 0.0147 | 8  | 0.0569 | 0.0701 | 23 |
|      |      | 400 | 0.0096 | 0.0104 | 8  | 0.0400 | 0.0495 | 24 |
| 0.20 | 0.90 | 50  | 0.0205 | 0.0234 | 14 | 0.1099 | 0.1269 | 15 |
|      |      | 100 | 0.0143 | 0.0167 | 17 | 0.0736 | 0.0885 | 20 |
|      |      | 200 | 0.0100 | 0.0118 | 18 | 0.0511 | 0.0625 | 22 |
|      |      | 400 | 0.0071 | 0.0083 | 17 | 0.0358 | 0.0442 | 23 |

Figure S1. Standard errors for the estimated calibration slope from LDA and logistic regression

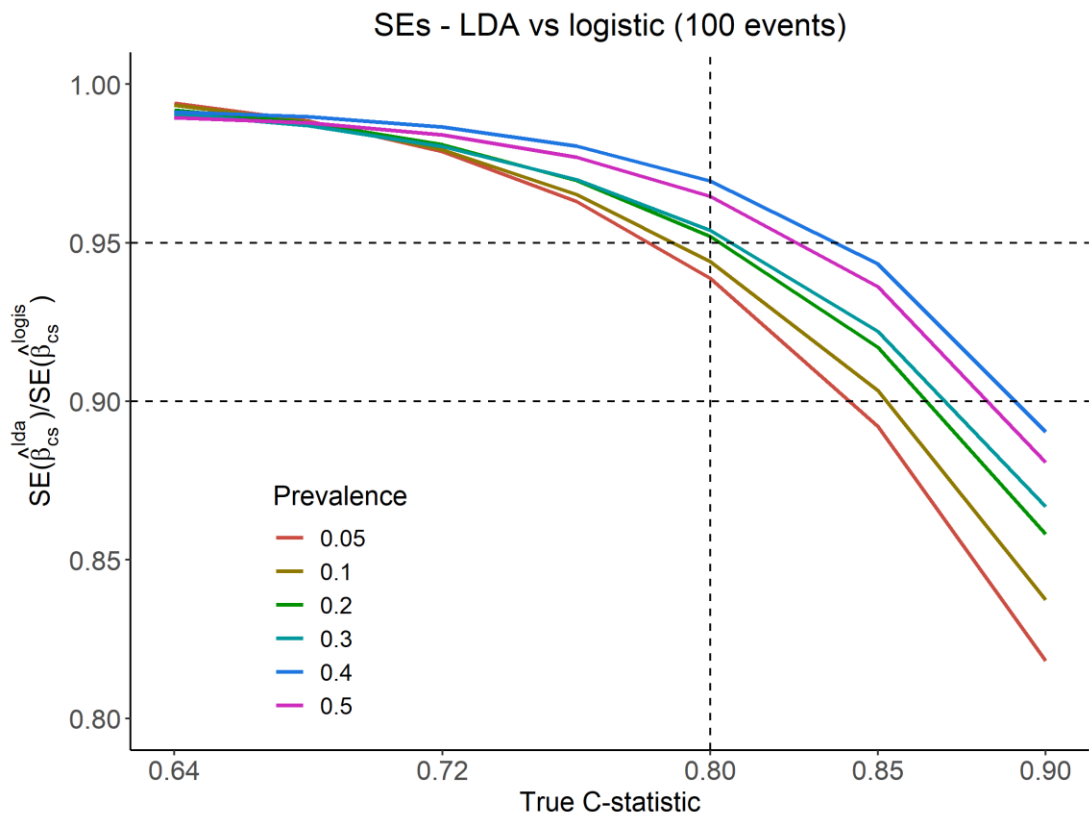

Figure S2. Marginal distribution of the linear predictor given the outcome under DGM1 when prevalence equals 0.1.

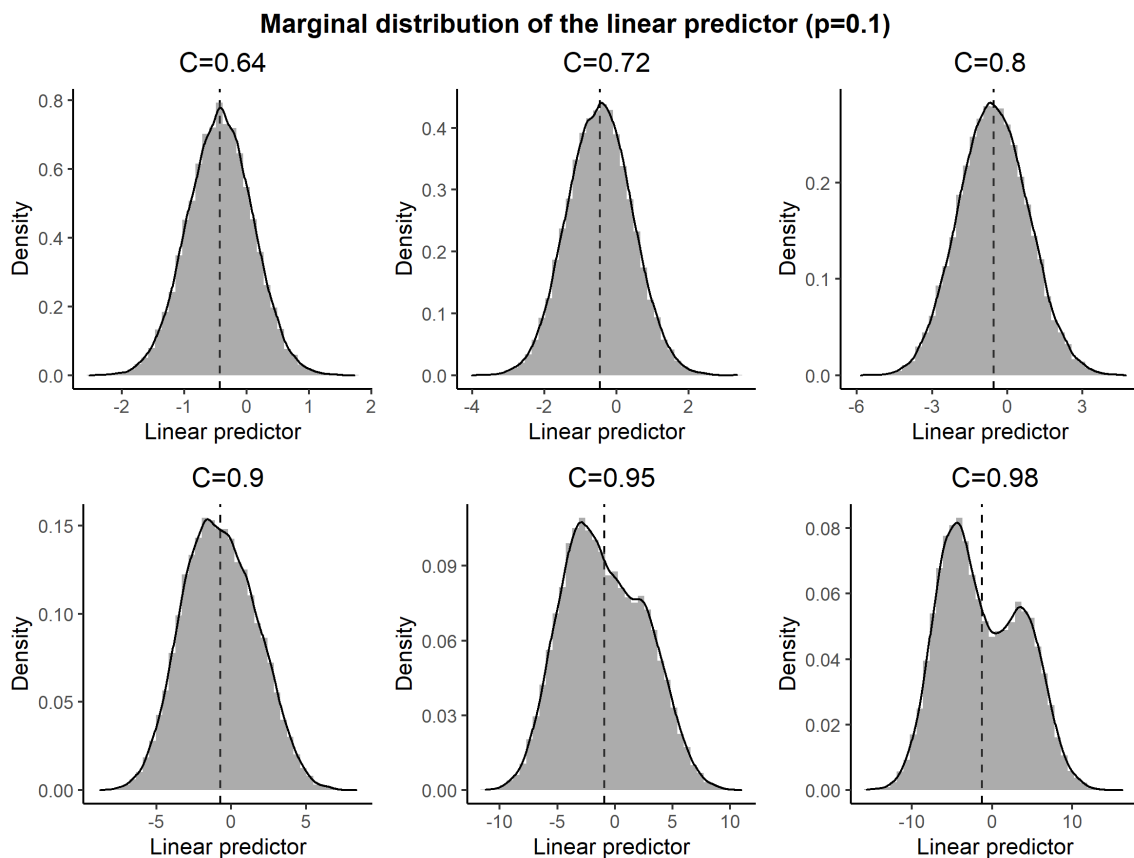

Figure S3. Conditional distribution of the linear predictor given the outcome under DGM3 when prevalence equals 0.1.

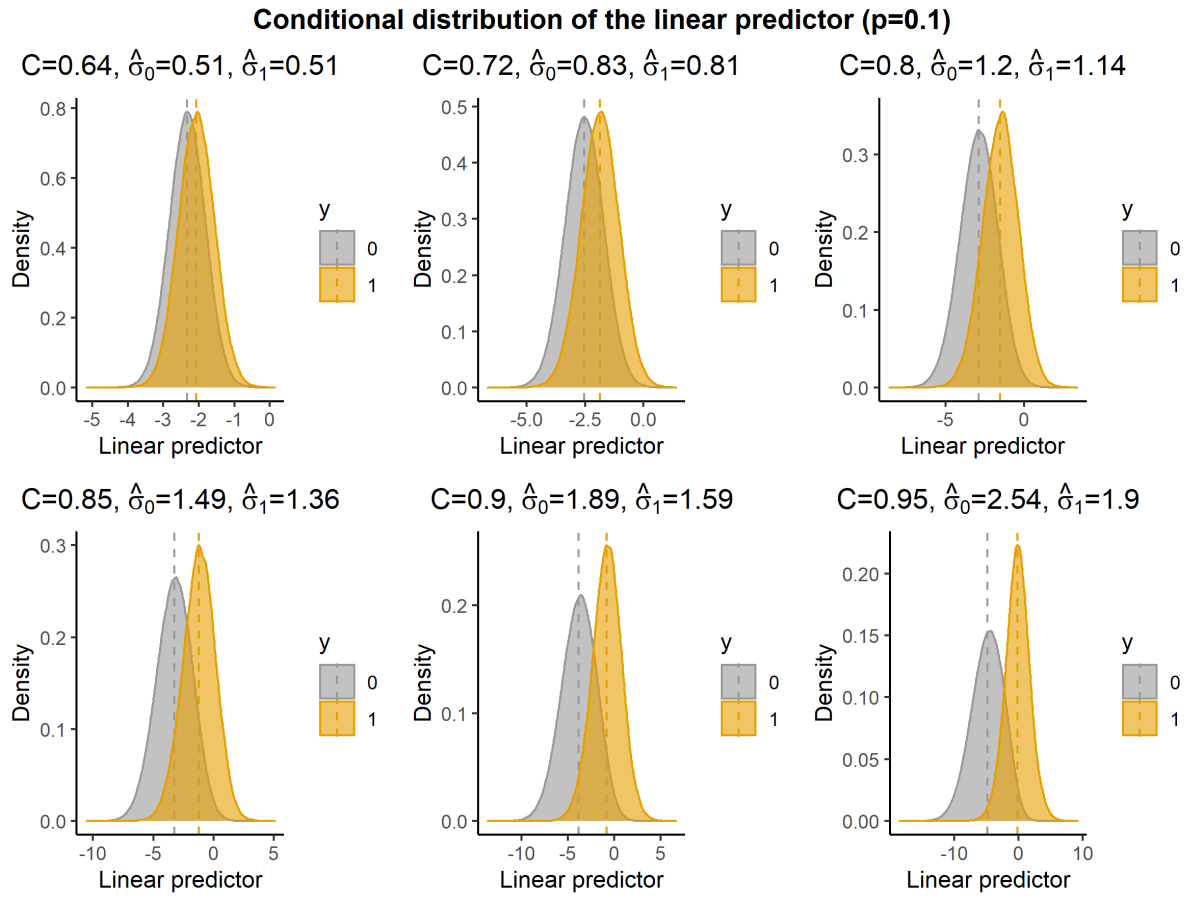

Figure S4. Conditional distribution of the linear predictor given the outcome under DGM4 when prevalence equals 0.1

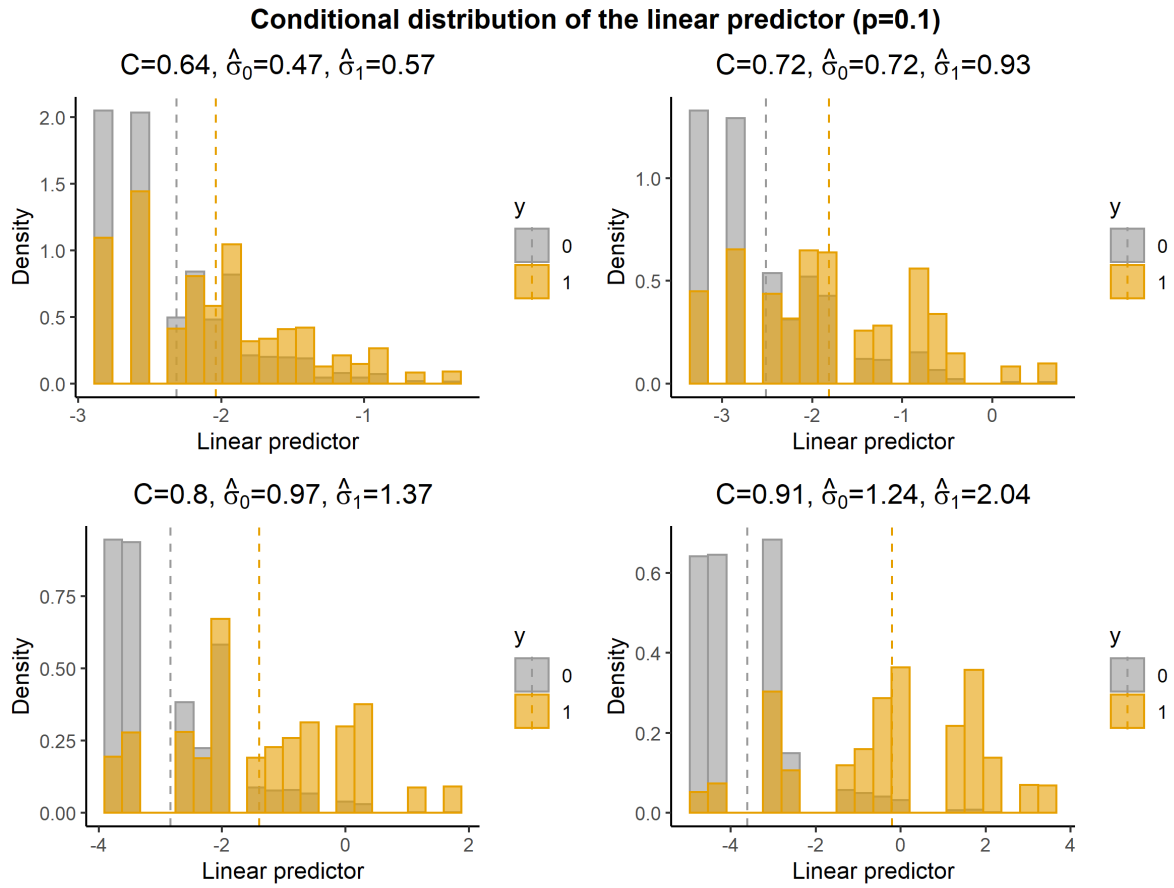

Supplement: sj-pdf-2-smm-10.1177_09622802211007522.pdf [file sj-pdf-2-smm-10.1177_09622802211007522.pdf]
